# Supplementary material for: Whole-genome doubling drives oncogenic loss of chromatin segregation
Source: Springer Nature journal article supplement (doi:10.1038/s41586-023-05794-2), 2023-03-15
Supplement: MOESM1 [file 41586_2023_5794_MOESM1_ESM.pdf]

---

**Supplementary information**

---

# **Whole-genome doubling drives oncogenic loss of chromatin segregation**

---

In the format provided by the  
authors and unedited

## **SUPPLEMENTARY INFORMATION to:**

### **Whole genome doubling drives oncogenic loss of chromatin segregation**

Ruxandra A. Lambuta<sup>1,2,\*</sup>, Luca Nanni<sup>2,3,4,\*</sup>, Yuanlong Liu<sup>2,3,4</sup>, Juan Diaz-Miyar<sup>1,2</sup>, Arvind Iyer<sup>2,3,4</sup>, Daniele Tavernari<sup>2,3,4</sup>, Natalya Katanayeva<sup>1,2</sup>, Giovanni Ciriello<sup>2,3,4,#</sup>, Elisa Oricchio<sup>1,2,#</sup>

<sup>1</sup> Swiss Institute for Experimental Cancer Research (ISREC), School of Life Sciences, EPFL

<sup>2</sup> Swiss Cancer Center Leman, Lausanne, Switzerland

<sup>3</sup> Department of Computational Biology, University of Lausanne (UNIL), 1015 Lausanne, Switzerland.

<sup>4</sup> Swiss Institute of Bioinformatics (SIB) Switzerland

\* These authors equally contributed to this work

# Corresponding Authors:

Correspondence and requests for materials should be addressed to:

Elisa Oricchio e-mail: [elisa.oricchio@epfl.ch](mailto:elisa.oricchio@epfl.ch)

Giovanni Ciriello e-mail: [giovanni.ciriello@unil.ch](mailto:giovanni.ciriello@unil.ch)

## **Contents:**

**Supplementary Fig. 1.** Hi-C maps in control, WGD and CIN-only models.

**Supplementary Fig. 2.** Quality filtering and individual scHi-C maps in control and WGD RPE<sup>TP53-/-</sup> cells.

**Supplementary Fig. 3.** Hi-C maps of 20-weeks post-WGD tumours.

**Supplementary Fig. 4.** Ploidy evolution of CP-A<sup>TP53-/-</sup> post-WGD cells.

**Supplementary Fig. 5:** Uncropped immunoblots present in main figures.

**Supplementary Fig. 6:** Gating strategy for the flow cytometry-based cell cycle analyses.

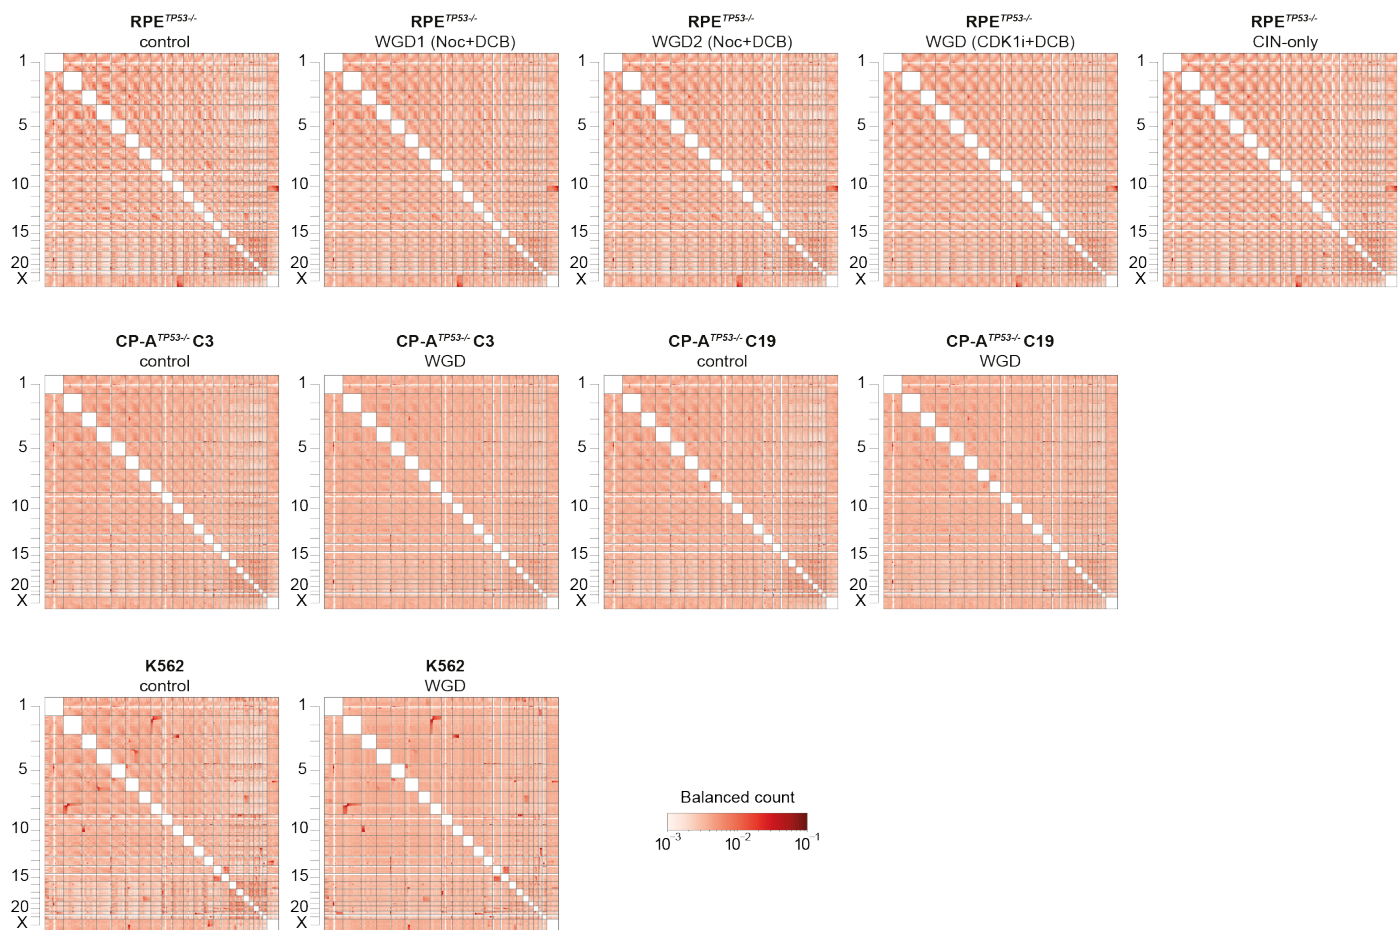

**Supplementary Fig. 1: Hi-C maps in control, WGD and CIN-only models.** Hi-C inter-chromosomal interaction maps at 10Mb resolution. Matrices are balanced using Iterative Correction so the inter-chromosomal marginal sum of each bin sums up to 1.



# A. RPE<sup>TP53-/-</sup> control

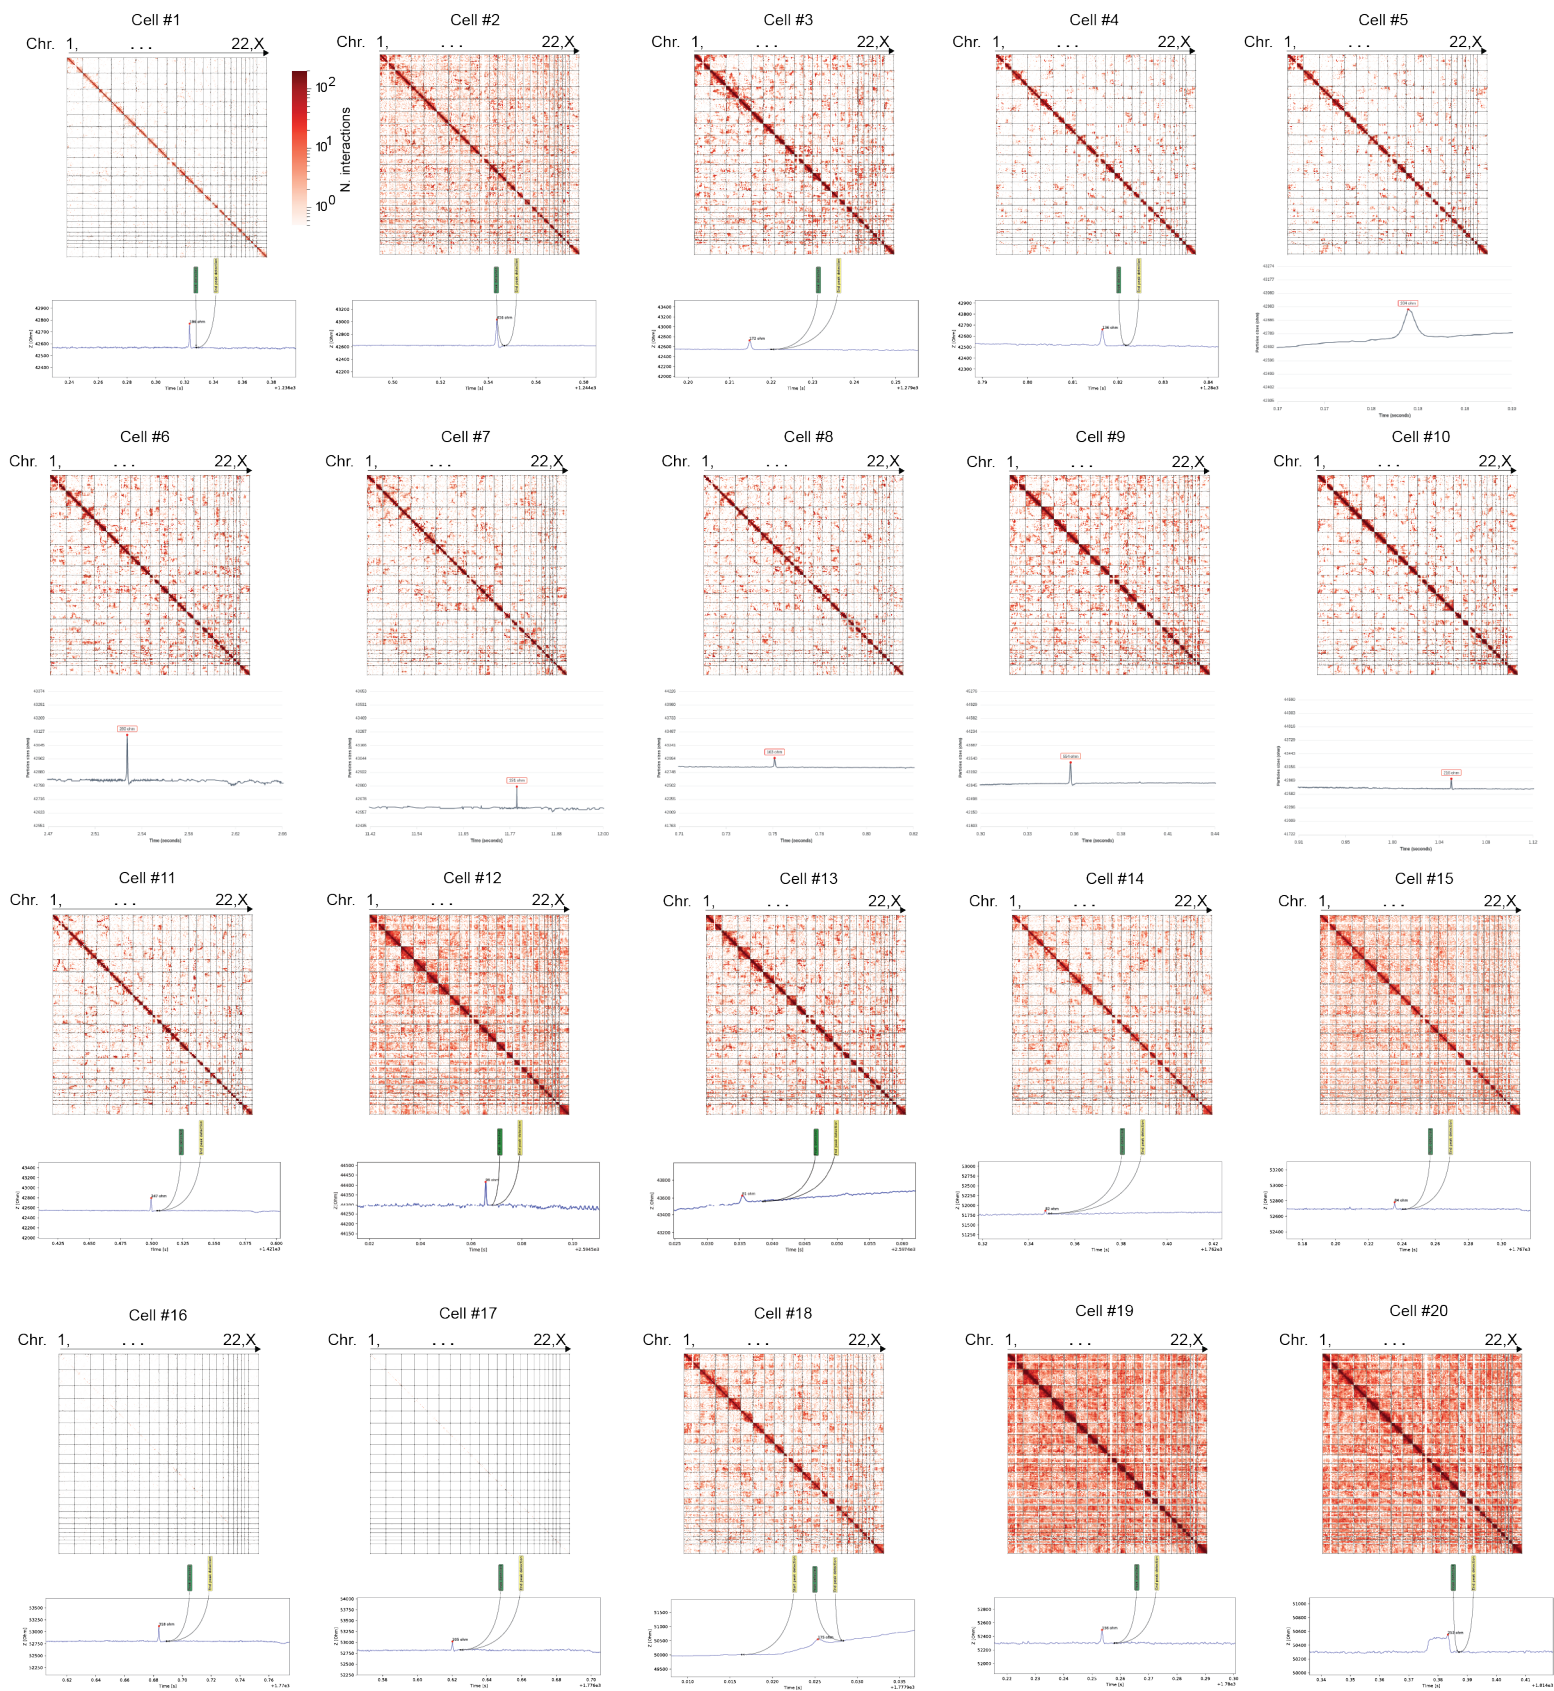

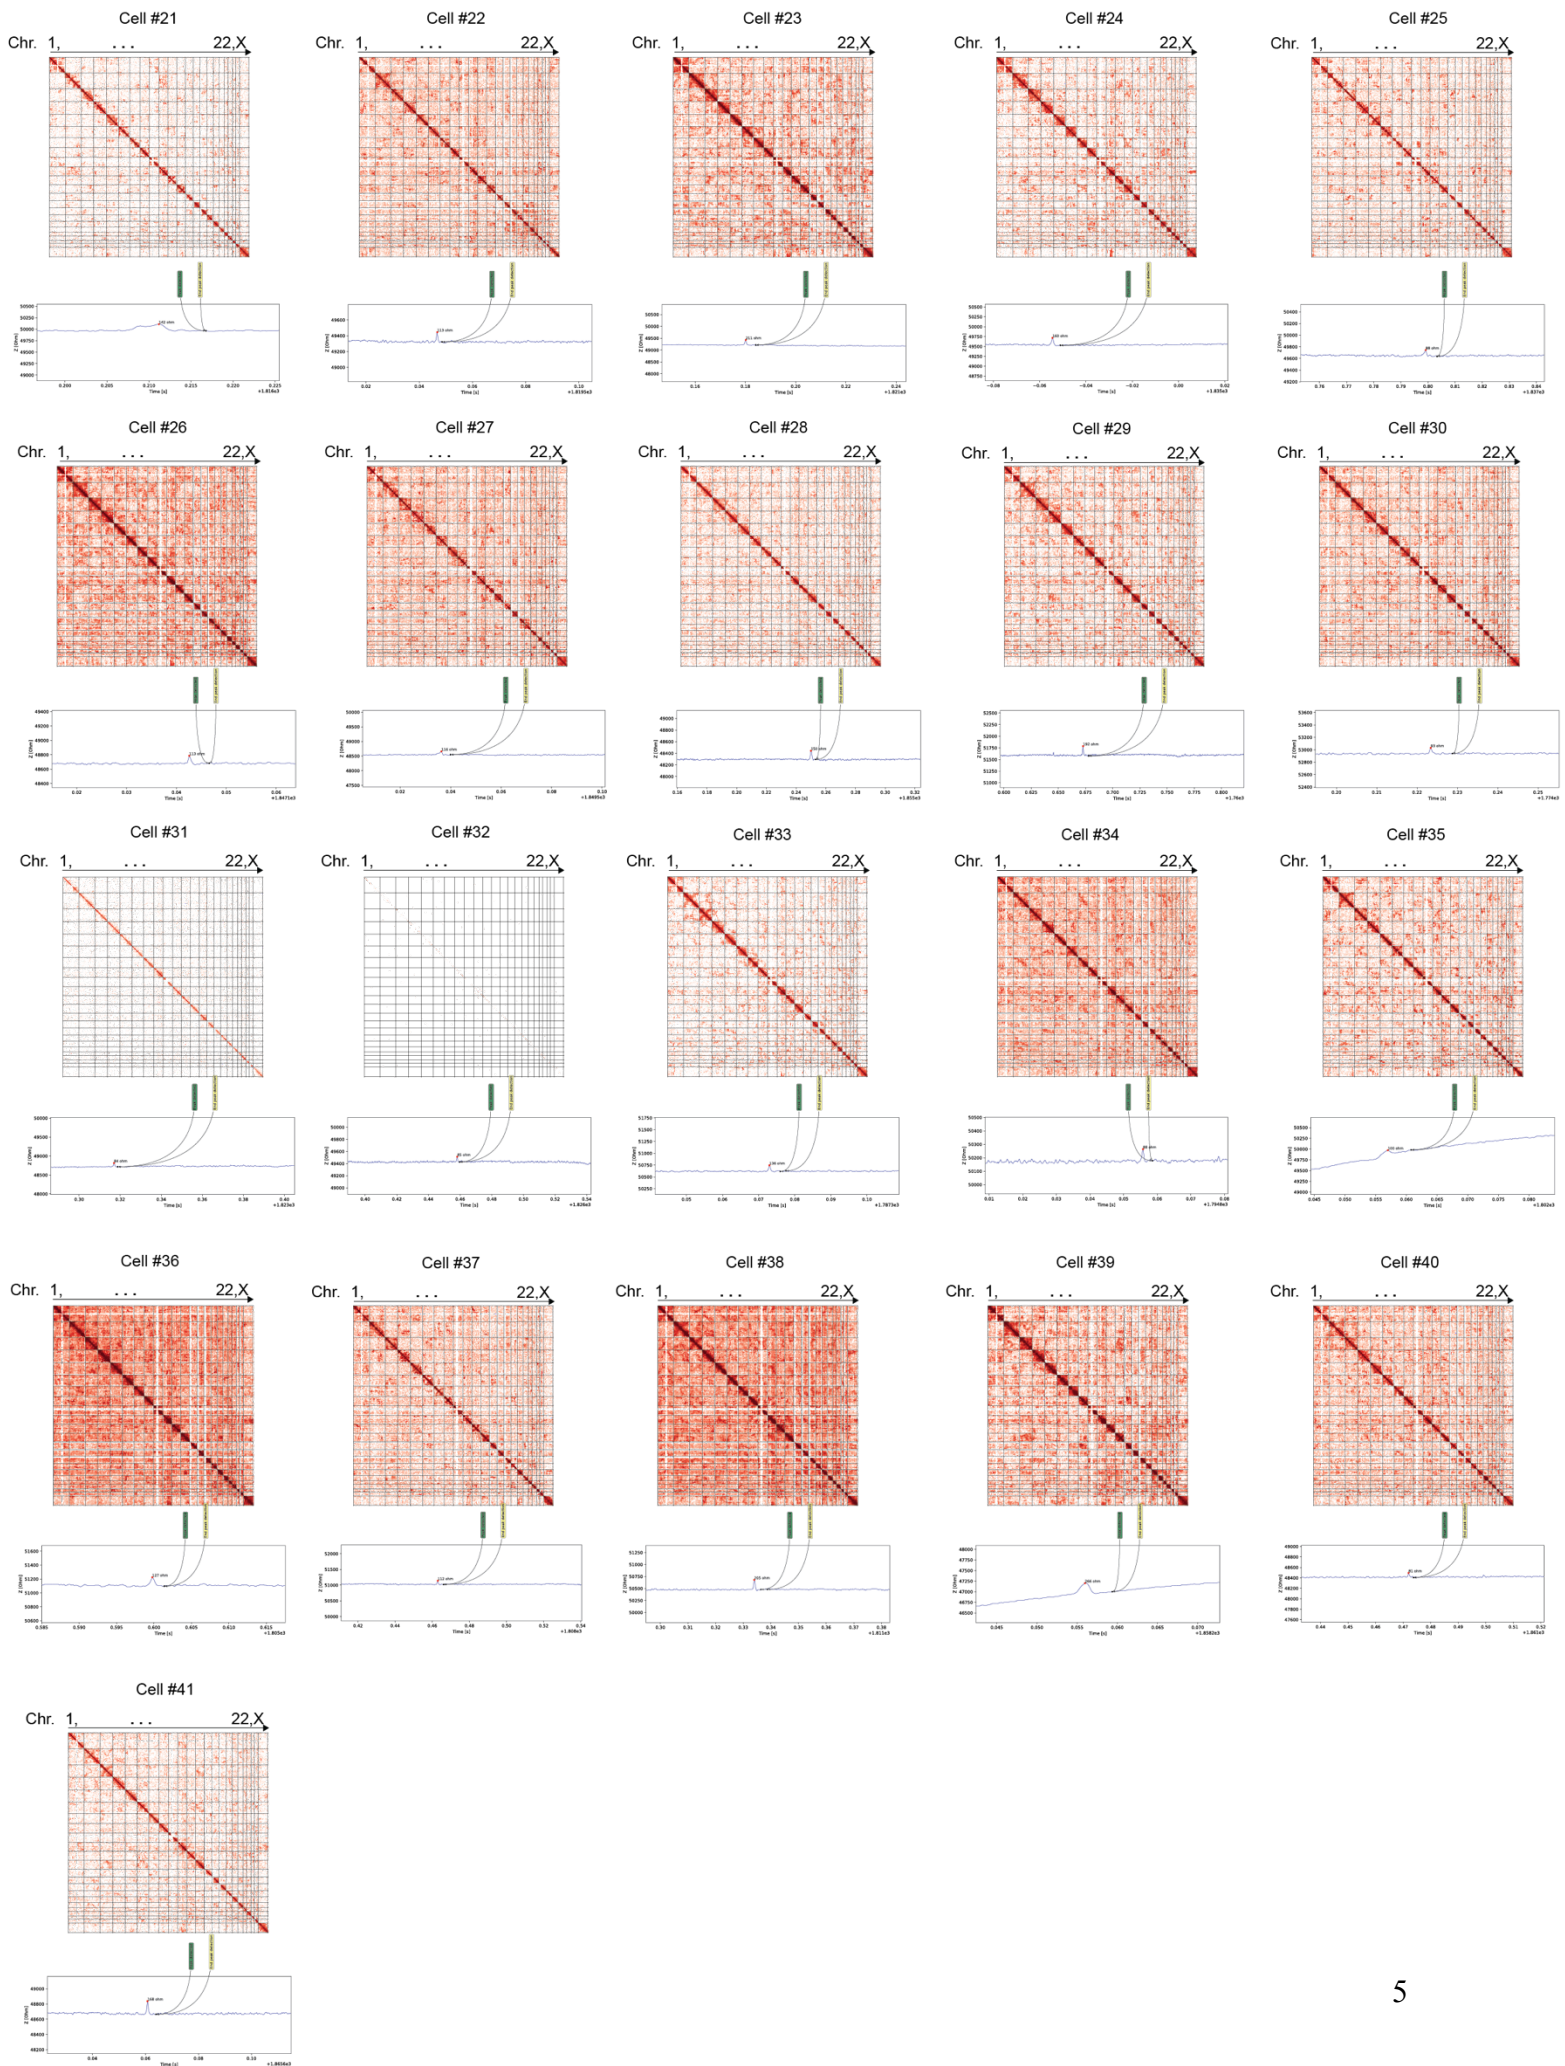



## B. RPE<sup>TP53-/-</sup> WGD

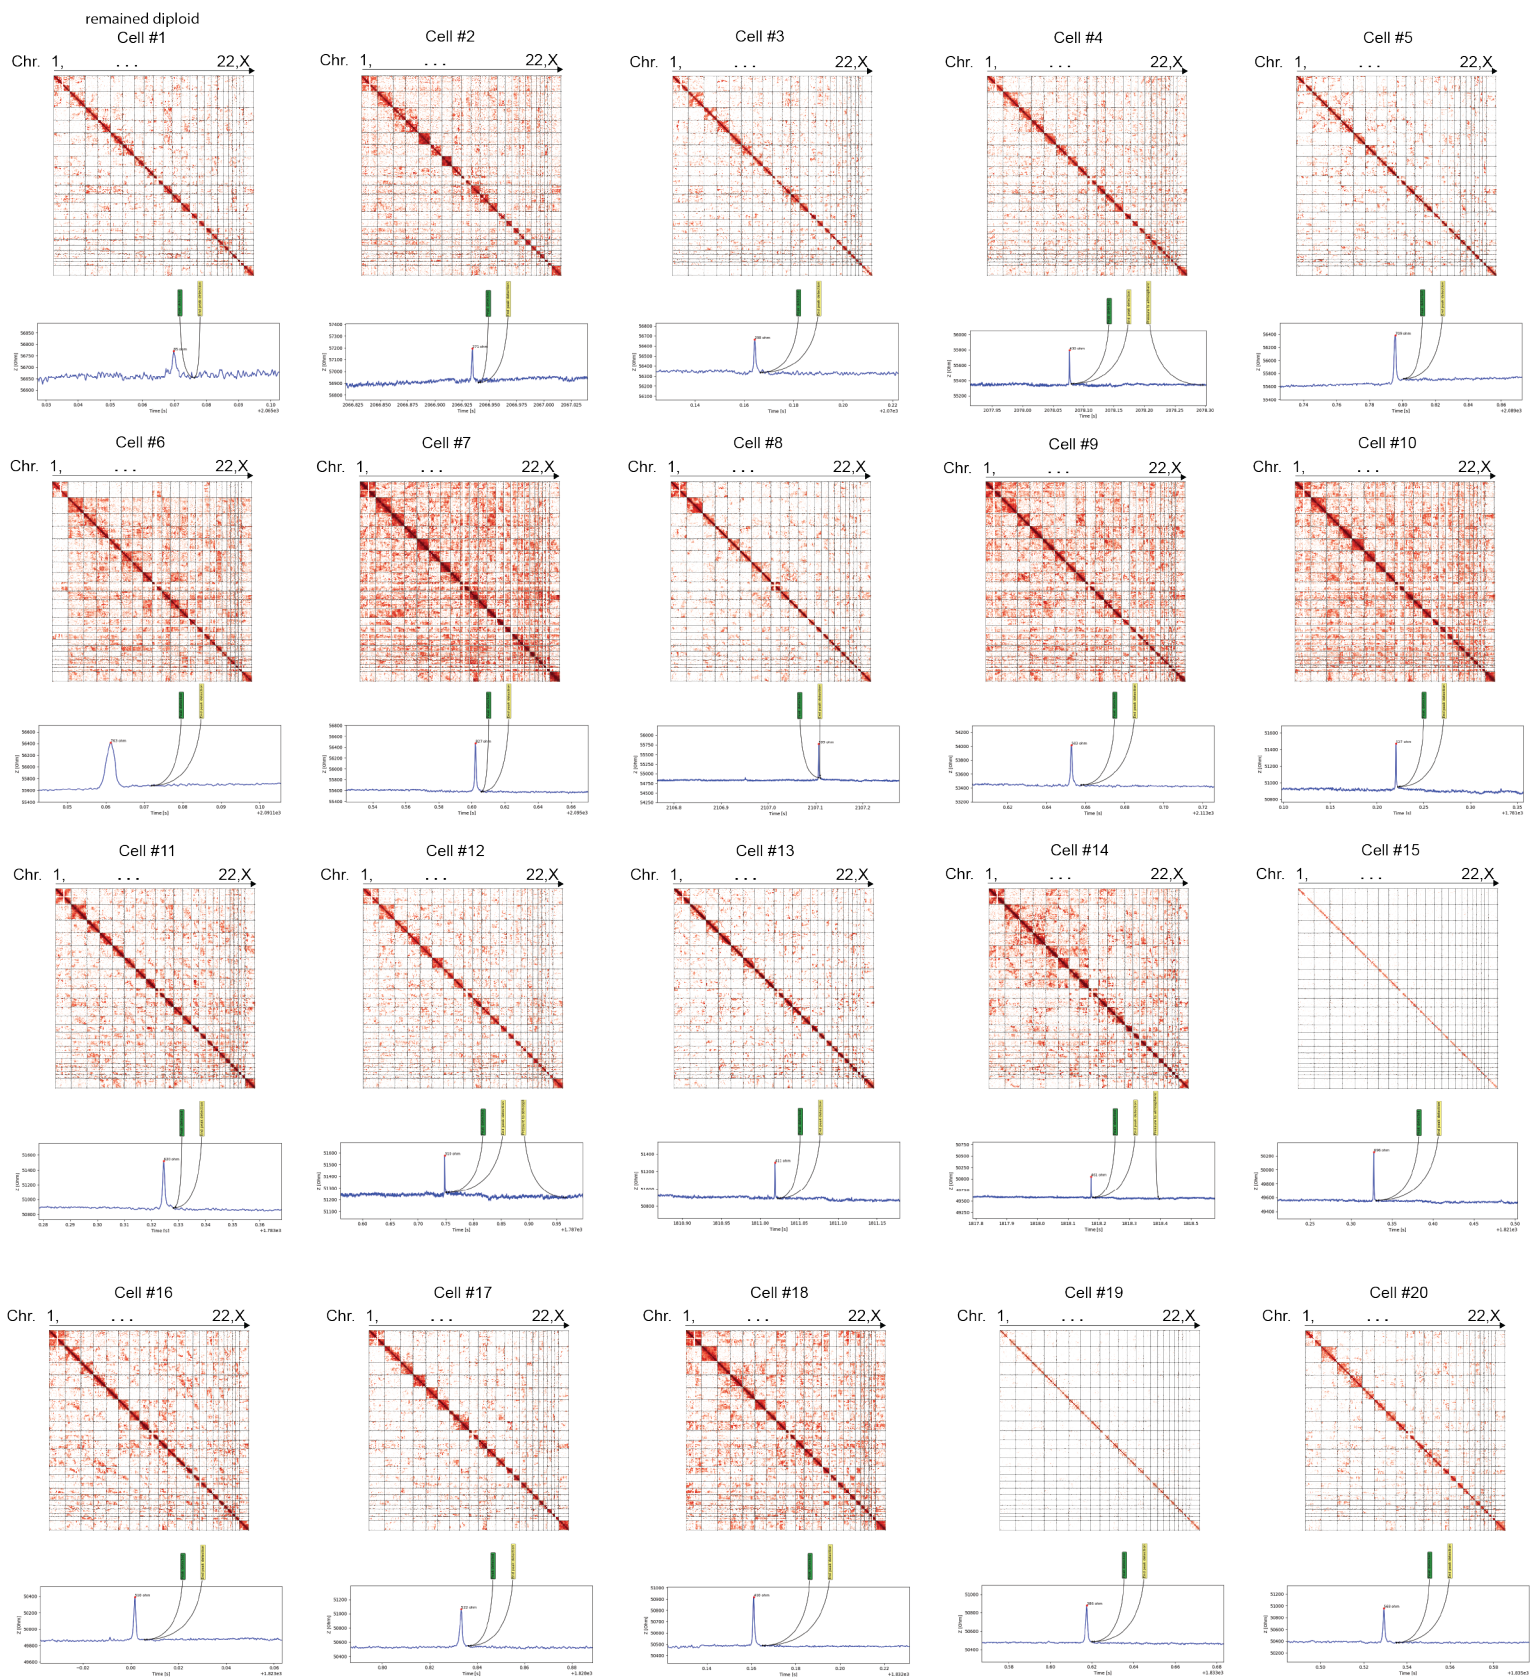

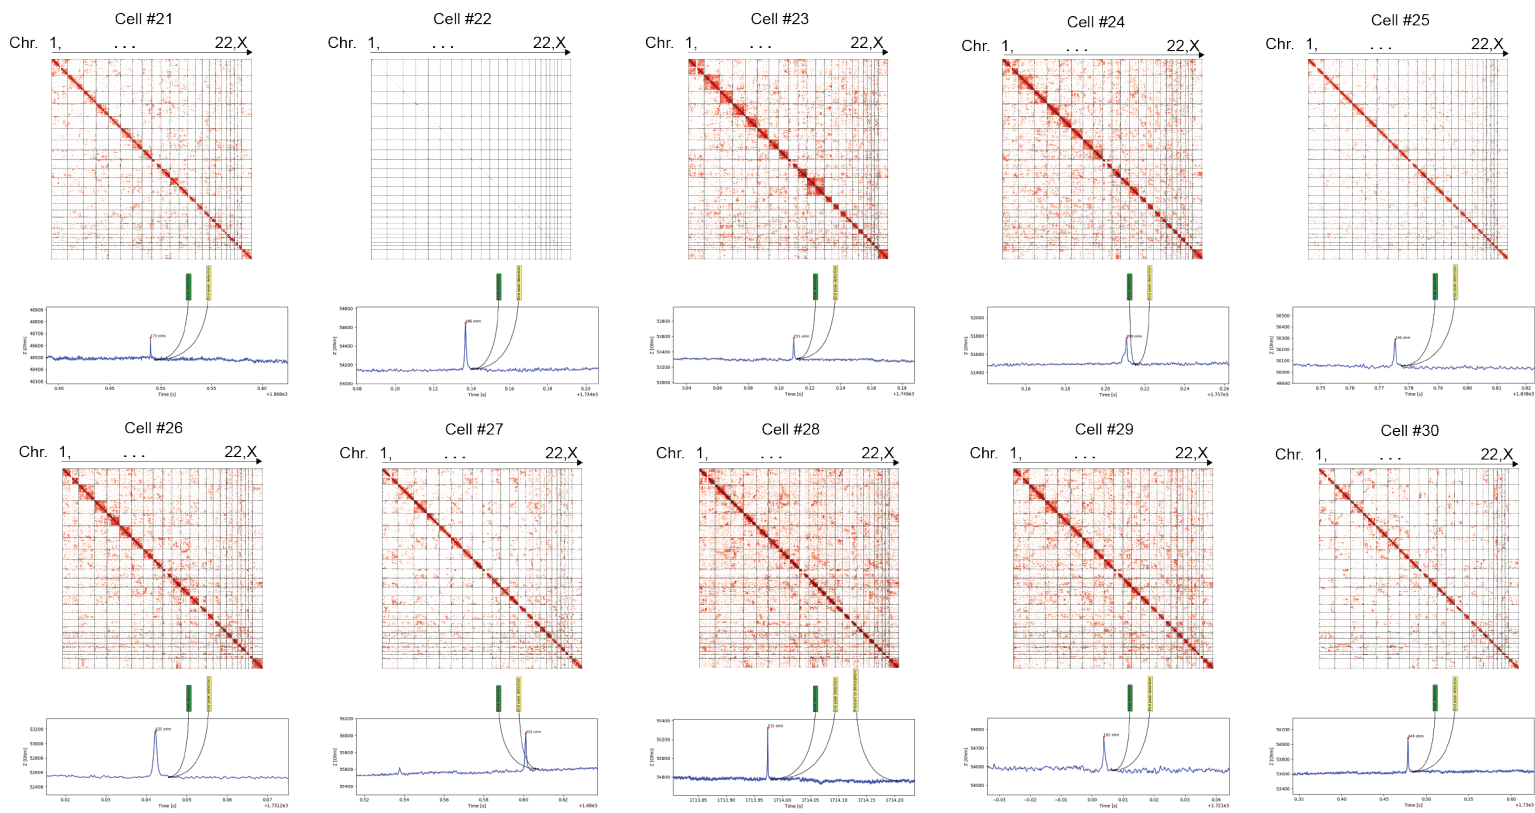

**Supplementary Fig. 2: Quality filtering and individual scHi-C maps in control and WGD RPE<sup>TP53-/-</sup> cells.** Raw Hi-C maps and impedance-based single nucleus sorting signal (ohm) for each single cell in the RPE<sup>TP53-/-</sup> control (A) and WGD (B) collections.

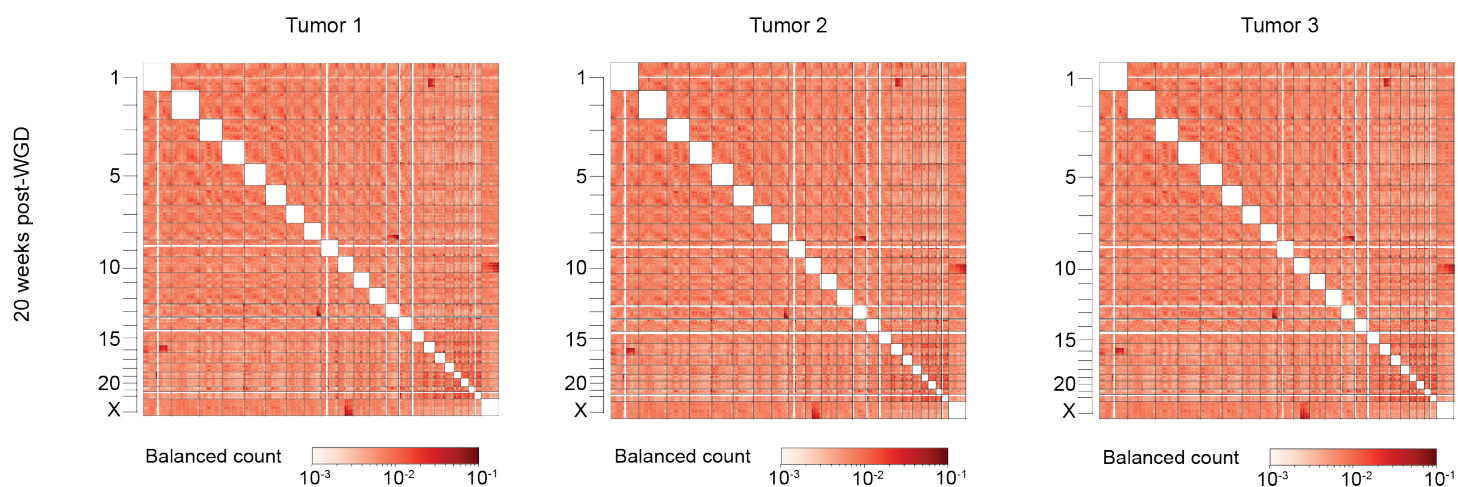

**Supplementary Fig. 3: Hi-C maps of 20-weeks post-WGD tumours.** Hi-C inter-chromosomal interaction maps at 10Mb resolution of the three 20-weeks post-WGD tumours originated from RPE<sup>TP53-/-</sup> cells. Matrices are balanced using Iterative Correction so the inter-chromosomal marginal sum of each bin sums up to 1.

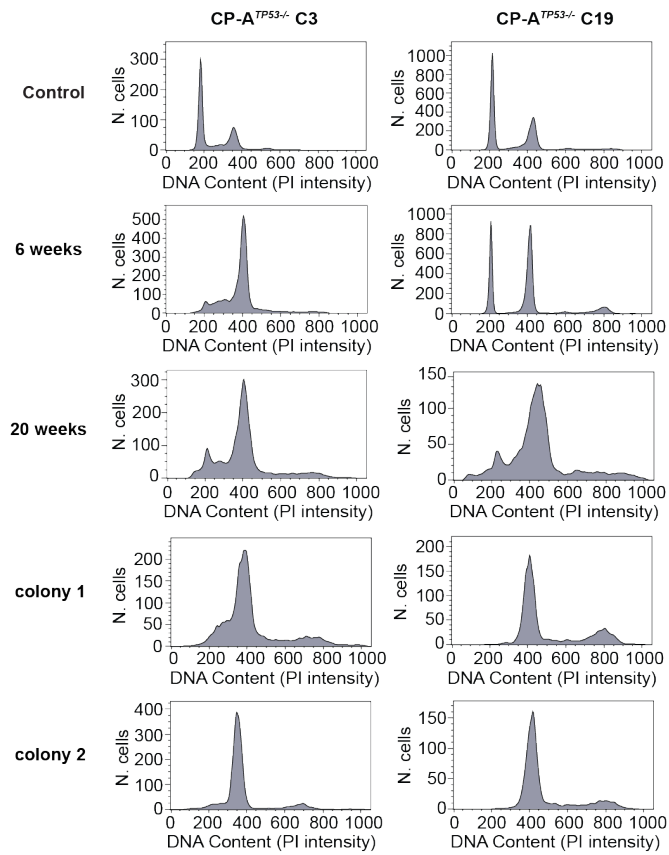

**Supplementary Fig. 4: Ploidy evolution of CP-A<sup>TP53-/-</sup> post-WGD cells.** PI-based cell cycle staining histograms of CP-A<sup>TP53-/-</sup> (clone 19 and clone 3) control, 6 weeks and 20 weeks post-WGD cells *in vitro*, and soft agar colonies.



**Figure 2a**

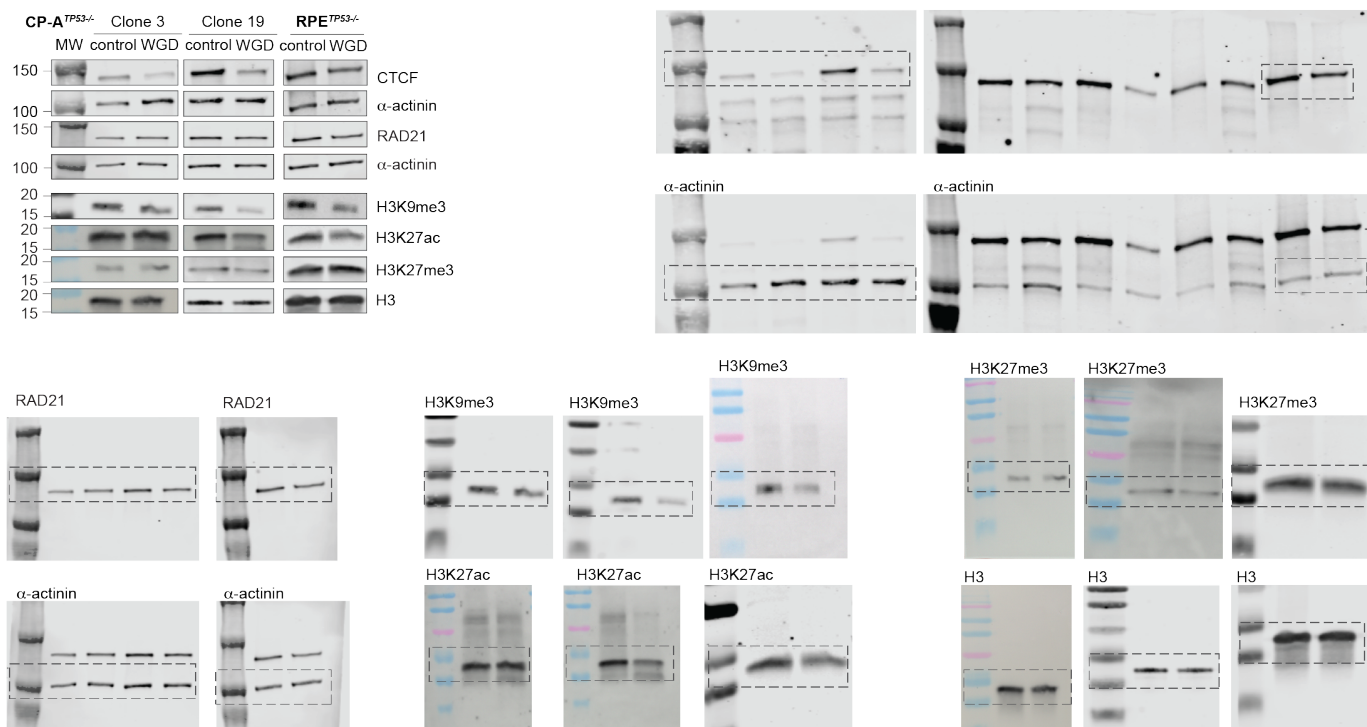

**Figure 2f**

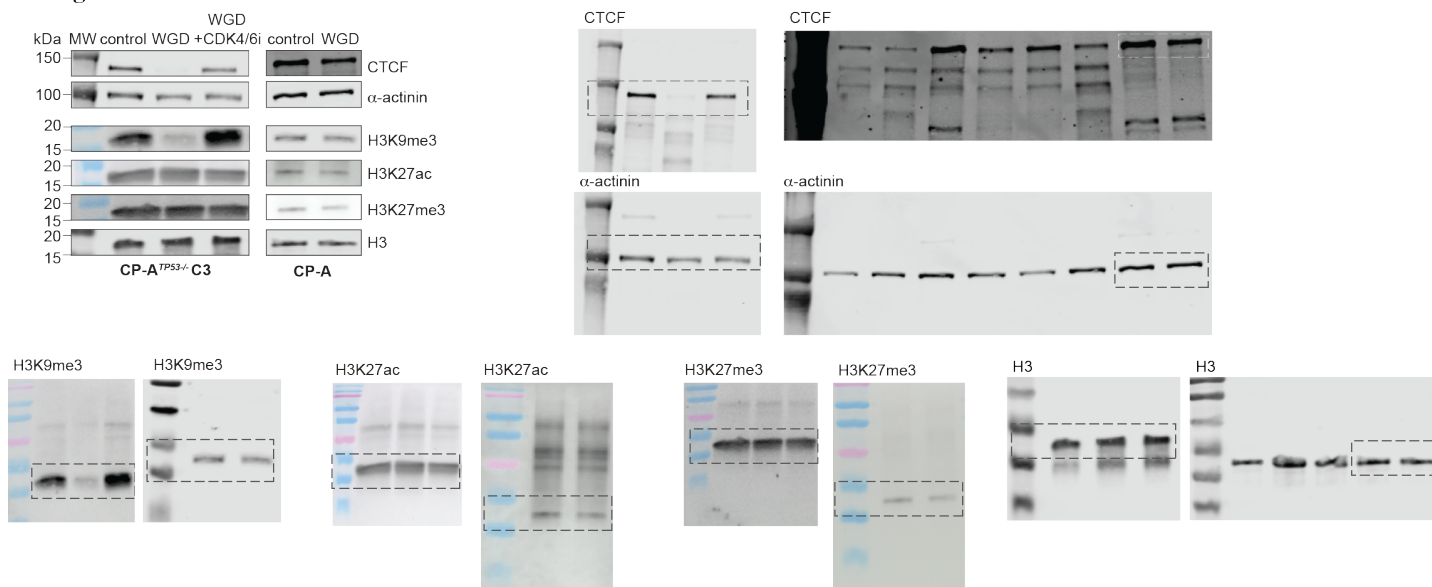

**Extended Data Figure 1a**

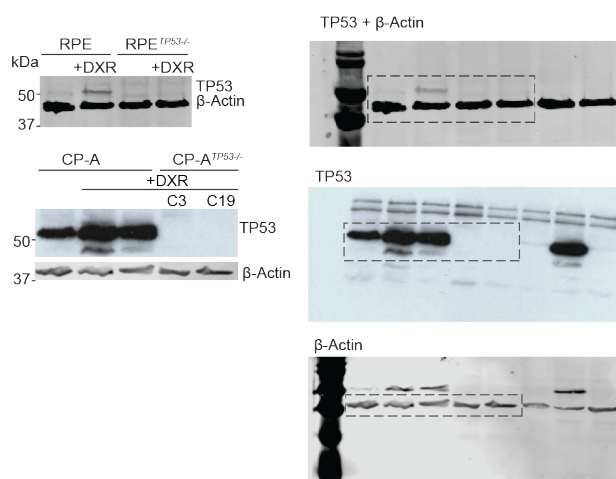

**Extended Data Figure 5d**

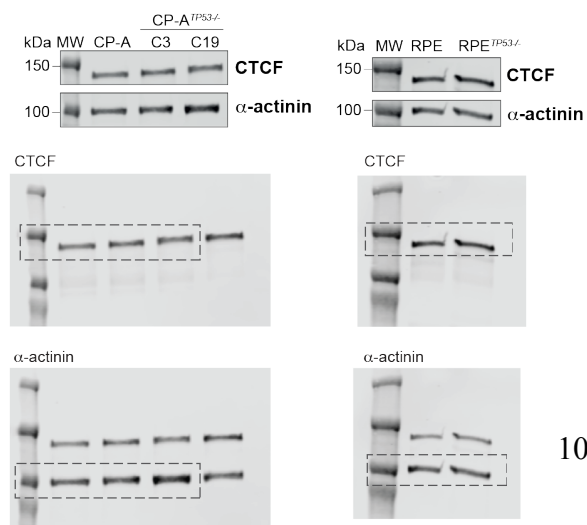

**Supplementary Fig. 5: Uncropped immunoblots present in main figures.**



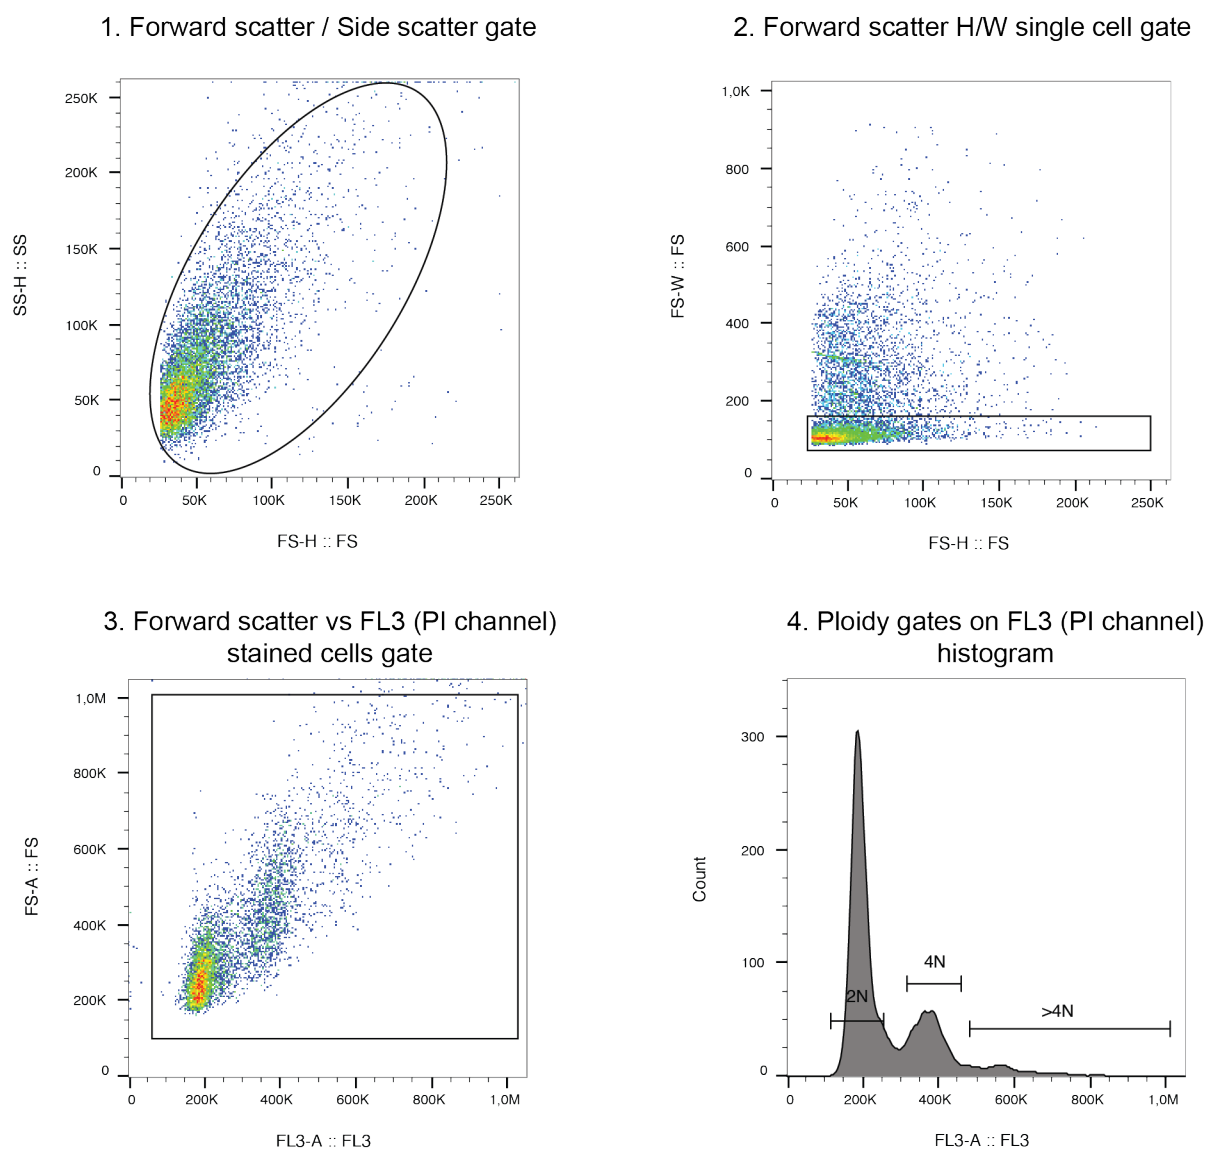

**Supplementary Fig. 6: Gating strategy for the flow cytometry-based cell cycle analyses.**
